# Supplementary material for: Reciprocal regulation of lymphoid tissue development in the large intestine by IL-25 and IL-23
Source: PubMed Central journal article supplement — Mucosal Immunol. 2014 Sep 24;8(3):582–95. doi: 10.1038/mi.2014.90 (PMC4424384; doi:10.1038/mi.2014.90), 2014-09-24
Supplement: mi201490x2.pdf [file mi201490x2.pdf]

**Supplementary Table 1.** Details of the primer sequences used for quantitative real-time PCR analysis

| Group                              | Sequence (5' to 3')    | Reference    |
|------------------------------------|------------------------|--------------|
| Eubacteria (all bacteria)          | ACTCCTACGGGAGGCAGCAGT  | Barman 2008  |
|                                    | ATTACCGCGGCTGCTGGC     |              |
| <i>Lactobacillus / Lactococcus</i> | AGCAGTAGGGAATCTTCCA    | Barman 2008  |
|                                    | CACCGCTACACATGGAG      |              |
| <i>Bacteroides</i>                 | GGTTCTGAGAGGAGGTCCC    | Barman 2008  |
|                                    | GCTGCCTCCCGTAGGAGT     |              |
| Segmented filamentous bacteria     | GACGCTGAGGCATGAGAGCAT  | Barman 2008  |
|                                    | GACGGCACGGATTGTTATTCA  |              |
| <i>Enterobacteriaceae</i>          | GTGCCAGCMGCCGCGGTAA    | Barman 2008  |
|                                    | GCCTCAAGGGCACAACTCCAAG |              |
| <i>Clostridium perfringens</i>     | CGCATAACGTTGAAAGATGG   | Barman 2008  |
|                                    | CCTTGGTAGGCCGTTACCC    |              |
| <i>Bifidobacterium</i>             | TCGCGTCYGGTGTGAAAG     | Bindels 2012 |
|                                    | CCACATCCAGCRTCCAC      |              |
| <i>Bacteroides – Prevotella</i>    | GAGAGGAAGGTCCCCAC      | Bindels 2012 |
|                                    | CGCTACTTGGCTGGTTCAG    |              |

## References

- BARMAN, M., UNOLD, D., SHIFLEY, K., AMIR, E., HUNG, K., BOS, N. & SALZMAN, N. 2008. Enteric Salmonellosis Disrupts the Microbial Ecology of the Murine Gastrointestinal Tract. *Infect. Immun.*, 76, 907-915.
- BINDELS, L. B., BECK, R., SCHAKMAN, O., MARTIN, J. C., DE BACKER, F., SOHET, F. M., DEWULF, E. M., PACHIKIAN, B. D., NEYRINCK, A. M., THISSEN, J.-P., VERRAX, J., CALDERON, P. B., POT, B., GRANGETTE, C., CANI, P. D., SCOTT, K. P. & DELZENNE, N. M. 2012. Restoring Specific Lactobacilli Levels Decreases Inflammation and Muscle Atrophy Markers in an Acute Leukemia Mouse Model. *PLoS ONE*, 7, e37971.
